# Supplementary material
Source: publisher figshare collection journal article supplement (https://acs.figshare.com/ndownloader/files/4387639)
Supplement: Supplementary file 1 [file 4387639]

#########################################################################
data_paper

_publ_contact_author
;
  V\'eronique Michelet
;
_publ_contact_author_phone        '00 33 1 44 27 32 77'
_publ_contact_author_fax          '00 33 1 44 27 38 41'
_publ_contact_author_email        'veronique-michelet@chimie-paristech.fr'
_publ_requested_journal           'Org. Lett.'
_publ_section_title               # Title of paper 
;
Room Temperature Metal Free Electrophilic 5-Endo-Selective 
Iodocarbocyclization of 1,5-Enynes 
; 

loop_
 _publ_author_name
 _publ_author_address
      'A. Pradal'
; Laboratoire Charles Friedel, 
UMR 7223, 
Ecole Nationale Sup\'erieure de Chimie de Paris, 
Chimie ParisTech, 
11, rue P. et M. Curie, 
75231 Paris cedex 05, 
France
;
      'A. Nasr'
; Laboratoire Charles Friedel, 
UMR 7223, 
Ecole Nationale Sup\'erieure de Chimie de Paris, 
Chimie ParisTech, 
11, rue P. et M. Curie, 
75231 Paris cedex 05, 
France
;
      'P.-Y. Toullec'
; Laboratoire Charles Friedel, 
UMR 7223, 
Ecole Nationale Sup\'erieure de Chimie de Paris, 
Chimie ParisTech, 
11, rue P. et M. Curie, 
75231 Paris cedex 05, 
France
;
      'V. Michelet'
; Laboratoire Charles Friedel 
UMR 7223, 
Ecole Nationale Sup\'erieure de Chimie de Paris, 
Chimie ParisTech, 
11, rue P. et M. Curie, 
75231 Paris cedex 05, 
France
;

#################### Material relevant to compound 1 #################### 
 
data_ans53
 
_audit_creation_method            SHELXL-97
_chemical_name_systematic
;
 ?
;
_chemical_name_common             ?
_chemical_melting_point           ?
_chemical_formula_moiety     'C25 H37 I O Si'
_chemical_formula_sum        'C25 H37 I O Si'
_chemical_formula_weight      508.54
 
loop_
 _atom_type_symbol
 _atom_type_description
 _atom_type_scat_dispersion_real
 _atom_type_scat_dispersion_imag
 _atom_type_scat_source
 'C'  'C'   0.0033   0.0016
 'International Tables Vol C Tables 4.2.6.8 and 6.1.1.4'
 'H'  'H'   0.0000   0.0000
 'International Tables Vol C Tables 4.2.6.8 and 6.1.1.4'
 'O'  'O'   0.0106   0.0060
 'International Tables Vol C Tables 4.2.6.8 and 6.1.1.4'
 'Si'  'Si'   0.0817   0.0704
 'International Tables Vol C Tables 4.2.6.8 and 6.1.1.4'
 'I'  'I'  -0.4742   1.8119
 'International Tables Vol C Tables 4.2.6.8 and 6.1.1.4'
 
_symmetry_cell_setting            monoclinic
_symmetry_space_group_name_H-M    'P c'
_symmetry_space_group_name_Hall   'P -2yc'
_symmetry_Int_Tables_number        7

 
loop_
 _symmetry_equiv_pos_as_xyz
 'x, y, z'
 'x, -y, z+1/2'
 
_cell_length_a                    11.0609(8)
_cell_length_b                    8.0727(7)
_cell_length_c                    14.9313(15)
_cell_angle_alpha                 90.00
_cell_angle_beta                  109.045(5)
_cell_angle_gamma                 90.00
_cell_volume                      1260.26(19)
_cell_formula_units_Z             2
_cell_measurement_temperature     200(2)
_cell_measurement_reflns_used     117
_cell_measurement_theta_min       5.5
_cell_measurement_theta_max       21.8
 
_exptl_crystal_description        stick
_exptl_crystal_colour             colourless
_exptl_crystal_size_max           0.55
_exptl_crystal_size_mid           0.22
_exptl_crystal_size_min           0.11
_exptl_crystal_density_meas       ?
_exptl_crystal_density_diffrn     1.340
_exptl_crystal_density_method     'not measured'
_exptl_crystal_F_000              524
_exptl_absorpt_coefficient_mu     1.330
_exptl_absorpt_correction_type    'multi-scan' 
_exptl_absorpt_correction_T_min   0.695
_exptl_absorpt_correction_T_max   0.864
_exptl_absorpt_process_details   
; 
SADABS, Bruker AXS Inc., Madison, 
Wisconsin, USA. 
;
  
_diffrn_ambient_temperature       200(2)
_diffrn_radiation_wavelength      0.71073
_diffrn_radiation_type            MoK\a
_diffrn_radiation_source          'fine-focus sealed tube'
_diffrn_radiation_monochromator   graphite
_diffrn_measurement_device_type   KappaCCD
_diffrn_measurement_method        'CCD rotation images, thick slices'
_diffrn_detector_area_resol_mean  9
_diffrn_standards_number          ?
_diffrn_standards_interval_count  ?
_diffrn_standards_interval_time   ?
_diffrn_standards_decay_%         ?
_diffrn_reflns_number             30608
_diffrn_reflns_av_R_equivalents   0.0400
_diffrn_reflns_av_sigmaI/netI     0.0386
_diffrn_reflns_limit_h_min        -14
_diffrn_reflns_limit_h_max        15
_diffrn_reflns_limit_k_min        -11
_diffrn_reflns_limit_k_max        11
_diffrn_reflns_limit_l_min        -20
_diffrn_reflns_limit_l_max        21
_diffrn_reflns_theta_min          3.23
_diffrn_reflns_theta_max          30.00
_reflns_number_total              6749
_reflns_number_gt                 5297
_reflns_threshold_expression      >2\s(I)
 
_computing_data_collection        'Collect (Nonius BV, 1997-2000)'
_computing_cell_refinement        'Dirax/lsq (Duisenberg & Schreurs, 1989-2000)'
_computing_data_reduction         'EvalCCD (Duisenberg & Schreurs 1990-2000)'
_computing_structure_solution     'SIR92 (Giacovazzo et al, 1993)'
_computing_structure_refinement   'SHELXL-97 (Sheldrick, 2008)'
_computing_molecular_graphics     'DIAMOND. Crystal Impact GbR, Bonn, Germany'
_computing_publication_material   'WinGX publication routines (Farrugia, 1999)'
 
_refine_special_details
;
The sof of Si atom positions were refined and converged to 0.45 / 0.55. They 
were then fixed to 0.5/0.5 values for following refinements.
The sof of C24-C25 were fixed at 0.5 which gave sensible results for Uij's.
 Refinement of F^2^ against ALL reflections.  The weighted R-factor wR and
 goodness of fit S are based on F^2^, conventional R-factors R are based
 on F, with F set to zero for negative F^2^. The threshold expression of
 F^2^ > 2\s(F^2^) is used only for calculating R-factors(gt) etc. and is
 not relevant to the choice of reflections for refinement.  R-factors based
 on F^2^ are statistically about twice as large as those based on F, and R-
 factors based on ALL data will be even larger.
;
 
_refine_ls_structure_factor_coef  Fsqd
_refine_ls_matrix_type            full
_refine_ls_weighting_scheme       calc
_refine_ls_weighting_details
 'calc w=1/[\s^2^(Fo^2^)+(0.0311P)^2^+0.0000P] where P=(Fo^2^+2Fc^2^)/3'
_atom_sites_solution_primary      direct
_atom_sites_solution_secondary    difmap
_atom_sites_solution_hydrogens    geom
_refine_ls_hydrogen_treatment     constr
_refine_ls_extinction_method      none
_refine_ls_extinction_coef        ?
_refine_ls_abs_structure_details
 'Flack H D (1983), Acta Cryst. A39, 876-881'
_refine_ls_abs_structure_Flack    0.056(12)
_refine_ls_number_reflns          6749
_refine_ls_number_parameters      310
_refine_ls_number_restraints      2
_refine_ls_R_factor_all           0.0487
_refine_ls_R_factor_gt            0.0293
_refine_ls_wR_factor_ref          0.0631
_refine_ls_wR_factor_gt           0.0578
_refine_ls_goodness_of_fit_ref    1.037
_refine_ls_restrained_S_all       1.037
_refine_ls_shift/su_max           0.002
_refine_ls_shift/su_mean          0.000
 
loop_
 _atom_site_label
 _atom_site_type_symbol
 _atom_site_fract_x
 _atom_site_fract_y
 _atom_site_fract_z
 _atom_site_U_iso_or_equiv
 _atom_site_adp_type
 _atom_site_occupancy
 _atom_site_symmetry_multiplicity
 _atom_site_calc_flag
 _atom_site_refinement_flags
 _atom_site_disorder_assembly
 _atom_site_disorder_group
I1 I 0.38947(2) 0.519081(17) 0.281412(18) 0.05617(7) Uani 1 1 d . . .
O1 O 0.65440(16) 0.99884(18) 0.16369(13) 0.0355(4) Uani 1 1 d . . .
C1 C 0.4325(2) 0.7166(3) 0.20677(16) 0.0348(5) Uani 1 1 d . A .
C2 C 0.3630(2) 0.7656(3) 0.12108(16) 0.0299(5) Uani 1 1 d . A .
C3 C 0.4335(2) 0.9046(3) 0.08622(15) 0.0261(4) Uani 1 1 d . . .
C4 C 0.5407(2) 0.9510(3) 0.18043(18) 0.0333(5) Uani 1 1 d . A .
H4 H 0.5100 1.0474 0.2092 0.040 Uiso 1 1 calc R . .
C5 C 0.5568(2) 0.8032(3) 0.24737(16) 0.0402(6) Uani 1 1 d . . .
H5A H 0.6291 0.7319 0.2462 0.048 Uiso 1 1 calc R A .
H5B H 0.5703 0.8397 0.3132 0.048 Uiso 1 1 calc R . .
C6 C 0.4864(2) 0.8306(3) 0.01192(16) 0.0318(5) Uani 1 1 d . A .
C7 C 0.4434(2) 0.8747(3) -0.07766(17) 0.0358(5) Uani 1 1 d . . .
H7 H 0.4848 0.8275 -0.1182 0.043 Uiso 1 1 calc R A .
C8 C 0.3365(3) 0.9911(3) -0.12176(19) 0.0404(6) Uani 1 1 d . A .
H8A H 0.2784 0.9419 -0.1809 0.049 Uiso 1 1 calc R . .
H8B H 0.3711 1.0955 -0.1384 0.049 Uiso 1 1 calc R . .
C9 C 0.2627(2) 1.0283(3) -0.0556(2) 0.0335(5) Uani 1 1 d . . .
H9A H 0.2059 0.9335 -0.0556 0.040 Uiso 1 1 calc R A .
H9B H 0.2081 1.1266 -0.0792 0.040 Uiso 1 1 calc R . .
C10 C 0.3486(2) 1.0608(3) 0.04532(16) 0.0276(4) Uani 1 1 d . A .
C11 C 0.5844(2) 0.6958(3) 0.04388(19) 0.0440(6) Uani 1 1 d . . .
H11A H 0.6075 0.6557 -0.0103 0.066 Uiso 1 1 calc R A .
H11B H 0.5489 0.6043 0.0705 0.066 Uiso 1 1 calc R . .
H11C H 0.6607 0.7394 0.0923 0.066 Uiso 1 1 calc R . .
C12 C 0.4338(2) 1.2103(3) 0.04436(17) 0.0337(5) Uani 1 1 d . . .
H12A H 0.4966 1.1791 0.0138 0.051 Uiso 1 1 calc R A .
H12B H 0.4785 1.2458 0.1096 0.051 Uiso 1 1 calc R . .
H12C H 0.3808 1.3014 0.0091 0.051 Uiso 1 1 calc R . .
C13 C 0.2642(2) 1.1063(3) 0.10465(19) 0.0383(5) Uani 1 1 d . . .
H13A H 0.2207 1.2116 0.0821 0.057 Uiso 1 1 calc R A .
H13B H 0.3172 1.1174 0.1712 0.057 Uiso 1 1 calc R . .
H13C H 0.2003 1.0192 0.0987 0.057 Uiso 1 1 calc R . .
C14 C 0.2416(2) 0.6861(3) 0.06416(17) 0.0348(5) Uani 1 1 d . . .
C15 C 0.2326(3) 0.5959(3) -0.01675(18) 0.0410(6) Uani 1 1 d . A .
H15 H 0.3040 0.5912 -0.0388 0.049 Uiso 1 1 calc R . .
C16 C 0.1221(3) 0.5128(3) -0.0658(2) 0.0517(8) Uani 1 1 d . . .
H16 H 0.1178 0.4509 -0.1208 0.062 Uiso 1 1 calc R A .
C17 C 0.0190(3) 0.5197(4) -0.0351(3) 0.0650(11) Uani 1 1 d . A .
H17 H -0.0571 0.4616 -0.0684 0.078 Uiso 1 1 calc R . .
C18 C 0.0245(3) 0.6106(4) 0.0440(3) 0.0660(9) Uani 1 1 d . . .
H18 H -0.0484 0.6174 0.0642 0.079 Uiso 1 1 calc R A .
C19 C 0.1354(3) 0.6919(3) 0.0942(2) 0.0509(7) Uani 1 1 d . A .
H19 H 0.1392 0.7523 0.1497 0.061 Uiso 1 1 calc R . .
Si1A Si 0.7730(2) 1.1245(3) 0.23171(16) 0.0376(5) Uani 0.45 1 d P A 1
C20A C 0.7146(7) 1.3188(13) 0.2651(7) 0.085(3) Uani 0.45 1 d P A 1
H20A H 0.6763 1.3864 0.2083 0.127 Uiso 0.45 1 calc PR A 1
H20B H 0.7860 1.3793 0.3095 0.127 Uiso 0.45 1 calc PR A 1
H20C H 0.6501 1.2951 0.2953 0.127 Uiso 0.45 1 calc PR A 1
C21A C 0.8594(10) 1.0103(17) 0.3409(8) 0.110(6) Uani 0.45 1 d P A 1
H21A H 0.7986 0.9740 0.3722 0.166 Uiso 0.45 1 calc PR A 1
H21B H 0.9237 1.0829 0.3837 0.166 Uiso 0.45 1 calc PR A 1
H21C H 0.9017 0.9135 0.3249 0.166 Uiso 0.45 1 calc PR A 1
Si1B Si 0.79038(18) 1.0479(3) 0.24045(13) 0.0383(4) Uani 0.55 1 d P A 2
C20B C 0.7619(8) 1.1645(15) 0.3369(6) 0.092(3) Uani 0.55 1 d P A 2
H20D H 0.7194 1.2694 0.3123 0.139 Uiso 0.55 1 calc PR A 2
H20E H 0.8438 1.1872 0.3862 0.139 Uiso 0.55 1 calc PR A 2
H20F H 0.7074 1.0994 0.3638 0.139 Uiso 0.55 1 calc PR A 2
C21B C 0.8898(7) 0.8612(10) 0.2882(8) 0.105(3) Uani 0.55 1 d P A 2
H21D H 0.8429 0.7867 0.3169 0.158 Uiso 0.55 1 calc PR A 2
H21E H 0.9699 0.8952 0.3362 0.158 Uiso 0.55 1 calc PR A 2
H21F H 0.9087 0.8037 0.2365 0.158 Uiso 0.55 1 calc PR A 2
C22 C 0.8713(2) 1.1678(4) 0.1646(2) 0.0558(8) Uani 1 1 d . . .
C23 C 1.0017(3) 1.2326(7) 0.2183(3) 0.1003(18) Uani 1 1 d . A .
H23A H 1.0491 1.1487 0.2637 0.151 Uiso 1 1 calc R . .
H23B H 0.9936 1.3334 0.2525 0.151 Uiso 1 1 calc R . .
H23C H 1.0477 1.2581 0.1739 0.151 Uiso 1 1 calc R . .
C24A C 0.7993(8) 1.2456(16) 0.0691(6) 0.107(3) Uani 0.55 1 d P A 1
H24A H 0.8569 1.2561 0.0315 0.160 Uiso 0.55 1 calc PR A 1
H24B H 0.7683 1.3554 0.0791 0.160 Uiso 0.55 1 calc PR A 1
H24C H 0.7266 1.1751 0.0353 0.160 Uiso 0.55 1 calc PR A 1
C25A C 0.9225(12) 0.9935(11) 0.1294(13) 0.122(5) Uani 0.55 1 d P A 1
H25A H 0.8493 0.9323 0.0875 0.183 Uiso 0.55 1 calc PR A 1
H25B H 0.9662 0.9253 0.1848 0.183 Uiso 0.55 1 calc PR A 1
H25C H 0.9820 1.0204 0.0952 0.183 Uiso 0.55 1 calc PR A 1
C24B C 0.8019(7) 1.3469(9) 0.1527(8) 0.077(3) Uani 0.45 1 d P A 2
H24D H 0.8237 1.4114 0.1045 0.115 Uiso 0.45 1 calc PR A 2
H24E H 0.8310 1.4062 0.2133 0.115 Uiso 0.45 1 calc PR A 2
H24F H 0.7090 1.3316 0.1331 0.115 Uiso 0.45 1 calc PR A 2
C25B C 0.8540(8) 1.0972(17) 0.0770(6) 0.073(3) Uani 0.45 1 d P A 2
H25D H 0.7624 1.0900 0.0416 0.109 Uiso 0.45 1 calc PR A 2
H25E H 0.8913 0.9858 0.0855 0.109 Uiso 0.45 1 calc PR A 2
H25F H 0.8961 1.1657 0.0417 0.109 Uiso 0.45 1 calc PR A 2
 
loop_
 _atom_site_aniso_label
 _atom_site_aniso_U_11
 _atom_site_aniso_U_22
 _atom_site_aniso_U_33
 _atom_site_aniso_U_23
 _atom_site_aniso_U_13
 _atom_site_aniso_U_12
I1 0.10123(15) 0.03347(8) 0.03775(9) 0.01064(12) 0.02807(8) -0.00396(15)
O1 0.0300(9) 0.0442(10) 0.0316(9) -0.0011(7) 0.0088(8) -0.0024(6)
C1 0.0519(14) 0.0270(11) 0.0299(12) 0.0036(9) 0.0195(11) 0.0007(10)
C2 0.0412(12) 0.0232(10) 0.0306(12) 0.0004(8) 0.0191(10) 0.0022(9)
C3 0.0337(12) 0.0213(10) 0.0239(11) 0.0014(8) 0.0103(10) 0.0025(9)
C4 0.0390(14) 0.0356(13) 0.0281(13) 0.0013(10) 0.0147(11) -0.0026(10)
C5 0.0512(14) 0.0415(14) 0.0264(12) 0.0077(10) 0.0108(11) 0.0052(11)
C6 0.0384(12) 0.0272(11) 0.0326(12) -0.0046(9) 0.0152(10) -0.0037(9)
C7 0.0498(15) 0.0338(12) 0.0294(13) -0.0053(10) 0.0208(12) -0.0043(11)
C8 0.0519(16) 0.0429(15) 0.0263(12) 0.0024(9) 0.0126(12) -0.0033(11)
C9 0.0379(13) 0.0287(11) 0.0317(14) 0.0068(9) 0.0084(11) -0.0002(10)
C10 0.0320(11) 0.0222(10) 0.0308(12) 0.0022(9) 0.0135(10) -0.0006(9)
C11 0.0490(14) 0.0390(14) 0.0450(15) -0.0014(11) 0.0166(13) 0.0110(11)
C12 0.0397(13) 0.0259(11) 0.0369(13) 0.0044(9) 0.0143(11) -0.0014(9)
C13 0.0447(13) 0.0311(12) 0.0436(15) 0.0017(11) 0.0208(12) 0.0073(11)
C14 0.0461(13) 0.0198(10) 0.0410(14) 0.0069(9) 0.0178(11) -0.0016(9)
C15 0.0546(15) 0.0248(11) 0.0400(14) 0.0026(10) 0.0107(12) -0.0038(10)
C16 0.0632(19) 0.0296(13) 0.0484(18) 0.0040(10) -0.0009(15) -0.0062(12)
C17 0.055(2) 0.0401(16) 0.081(3) 0.0135(15) -0.0047(19) -0.0165(13)
C18 0.0544(17) 0.0521(19) 0.094(3) 0.0136(18) 0.0282(18) -0.0141(14)
C19 0.0583(16) 0.0404(15) 0.0586(18) 0.0033(12) 0.0254(14) -0.0127(12)
Si1A 0.0304(10) 0.0454(12) 0.0337(10) -0.0014(10) 0.0062(8) -0.0021(10)
C20A 0.045(4) 0.106(7) 0.097(7) -0.074(6) 0.016(4) -0.025(4)
C21A 0.066(6) 0.169(14) 0.067(6) 0.070(7) -0.019(5) -0.037(7)
Si1B 0.0311(9) 0.0453(9) 0.0336(8) 0.0015(9) 0.0038(6) -0.0072(9)
C20B 0.070(5) 0.149(9) 0.065(5) -0.065(6) 0.031(4) -0.052(5)
C21B 0.046(3) 0.086(4) 0.141(7) 0.044(8) -0.028(4) 0.005(5)
C22 0.0354(14) 0.067(2) 0.0612(19) 0.0050(15) 0.0103(14) -0.0077(13)
C23 0.057(2) 0.166(5) 0.085(3) -0.043(3) 0.034(2) -0.053(3)
C24A 0.088(5) 0.142(10) 0.087(6) 0.039(6) 0.025(5) -0.037(6)
C25A 0.108(8) 0.093(7) 0.213(15) -0.065(7) 0.116(10) -0.027(5)
C24B 0.049(4) 0.044(4) 0.141(8) 0.031(5) 0.037(5) -0.002(3)
C25B 0.054(5) 0.123(9) 0.047(5) -0.016(5) 0.023(4) -0.006(5)
 
_geom_special_details
;
 All s.u.'s (except the s.u. in the dihedral angle between two l.s. planes)
 are estimated using the full covariance matrix.  The cell s.u.'s are taken
 into account individually in the estimation of s.u.'s in distances, angles
 and torsion angles; correlations between s.u.'s in cell parameters are only
 used when they are defined by crystal symmetry.  An approximate (isotropic)
 treatment of cell s.u.'s is used for estimating s.u.'s involving l.s. planes.
;
 
loop_
 _geom_bond_atom_site_label_1
 _geom_bond_atom_site_label_2
 _geom_bond_distance
 _geom_bond_site_symmetry_2
 _geom_bond_publ_flag
I1 C1 2.087(2) . ?
O1 C4 1.414(3) . ?
O1 Si1B 1.615(3) . ?
O1 Si1A 1.707(3) . ?
C1 C2 1.320(3) . ?
C1 C5 1.484(4) . ?
C2 C14 1.481(3) . ?
C2 C3 1.550(3) . ?
C3 C6 1.535(3) . ?
C3 C4 1.561(3) . ?
C3 C10 1.572(3) . ?
C4 C5 1.529(3) . ?
C4 H4 1.0000 . ?
C5 H5A 0.9900 . ?
C5 H5B 0.9900 . ?
C6 C7 1.314(3) . ?
C6 C11 1.499(3) . ?
C7 C8 1.486(4) . ?
C7 H7 0.9500 . ?
C8 C9 1.503(4) . ?
C8 H8A 0.9900 . ?
C8 H8B 0.9900 . ?
C9 C10 1.519(4) . ?
C9 H9A 0.9900 . ?
C9 H9B 0.9900 . ?
C10 C13 1.527(3) . ?
C10 C12 1.534(3) . ?
C11 H11A 0.9800 . ?
C11 H11B 0.9800 . ?
C11 H11C 0.9800 . ?
C12 H12A 0.9800 . ?
C12 H12B 0.9800 . ?
C12 H12C 0.9800 . ?
C13 H13A 0.9800 . ?
C13 H13B 0.9800 . ?
C13 H13C 0.9800 . ?
C14 C15 1.386(3) . ?
C14 C19 1.388(4) . ?
C15 C16 1.377(4) . ?
C15 H15 0.9500 . ?
C16 C17 1.362(6) . ?
C16 H16 0.9500 . ?
C17 C18 1.375(6) . ?
C17 H17 0.9500 . ?
C18 C19 1.377(4) . ?
C18 H18 0.9500 . ?
C19 H19 0.9500 . ?
Si1A C22 1.737(4) . ?
Si1A C20A 1.827(8) . ?
Si1A C21A 1.845(9) . ?
C20A H20A 0.9800 . ?
C20A H20B 0.9800 . ?
C20A H20C 0.9800 . ?
C21A H21A 0.9800 . ?
C21A H21B 0.9800 . ?
C21A H21C 0.9800 . ?
Si1B C20B 1.832(7) . ?
Si1B C21B 1.865(7) . ?
Si1B C22 1.918(4) . ?
C20B H20D 0.9800 . ?
C20B H20E 0.9800 . ?
C20B H20F 0.9800 . ?
C21B H21D 0.9800 . ?
C21B H21E 0.9800 . ?
C21B H21F 0.9800 . ?
C22 C25B 1.382(9) . ?
C22 C23 1.497(4) . ?
C22 C24A 1.523(8) . ?
C22 C24B 1.620(8) . ?
C22 C25A 1.664(8) . ?
C23 H23A 0.9800 . ?
C23 H23B 0.9800 . ?
C23 H23C 0.9800 . ?
C24A H24A 0.9800 . ?
C24A H24B 0.9800 . ?
C24A H24C 0.9800 . ?
C25A H25A 0.9800 . ?
C25A H25B 0.9800 . ?
C25A H25C 0.9800 . ?
C24B H24D 0.9800 . ?
C24B H24E 0.9800 . ?
C24B H24F 0.9800 . ?
C25B H25D 0.9800 . ?
C25B H25E 0.9800 . ?
C25B H25F 0.9800 . ?
 
loop_
 _geom_angle_atom_site_label_1
 _geom_angle_atom_site_label_2
 _geom_angle_atom_site_label_3
 _geom_angle
 _geom_angle_site_symmetry_1
 _geom_angle_site_symmetry_3
 _geom_angle_publ_flag
C4 O1 Si1B 128.16(18) . . ?
C4 O1 Si1A 127.79(18) . . ?
Si1B O1 Si1A 22.27(7) . . ?
C2 C1 C5 115.0(2) . . ?
C2 C1 I1 125.76(18) . . ?
C5 C1 I1 118.96(15) . . ?
C1 C2 C14 123.9(2) . . ?
C1 C2 C3 110.2(2) . . ?
C14 C2 C3 125.61(18) . . ?
C6 C3 C2 108.26(17) . . ?
C6 C3 C4 112.83(18) . . ?
C2 C3 C4 100.86(17) . . ?
C6 C3 C10 110.61(18) . . ?
C2 C3 C10 114.15(18) . . ?
C4 C3 C10 109.85(18) . . ?
O1 C4 C5 114.1(2) . . ?
O1 C4 C3 111.4(2) . . ?
C5 C4 C3 107.10(19) . . ?
O1 C4 H4 108.0 . . ?
C5 C4 H4 108.0 . . ?
C3 C4 H4 108.0 . . ?
C1 C5 C4 101.87(18) . . ?
C1 C5 H5A 111.4 . . ?
C4 C5 H5A 111.4 . . ?
C1 C5 H5B 111.4 . . ?
C4 C5 H5B 111.4 . . ?
H5A C5 H5B 109.3 . . ?
C7 C6 C11 120.3(2) . . ?
C7 C6 C3 122.2(2) . . ?
C11 C6 C3 117.3(2) . . ?
C6 C7 C8 126.4(2) . . ?
C6 C7 H7 116.8 . . ?
C8 C7 H7 116.8 . . ?
C7 C8 C9 111.1(2) . . ?
C7 C8 H8A 109.4 . . ?
C9 C8 H8A 109.4 . . ?
C7 C8 H8B 109.4 . . ?
C9 C8 H8B 109.4 . . ?
H8A C8 H8B 108.0 . . ?
C8 C9 C10 112.9(2) . . ?
C8 C9 H9A 109.0 . . ?
C10 C9 H9A 109.0 . . ?
C8 C9 H9B 109.0 . . ?
C10 C9 H9B 109.0 . . ?
H9A C9 H9B 107.8 . . ?
C9 C10 C13 108.33(19) . . ?
C9 C10 C12 108.29(19) . . ?
C13 C10 C12 108.07(19) . . ?
C9 C10 C3 110.33(18) . . ?
C13 C10 C3 111.62(18) . . ?
C12 C10 C3 110.09(18) . . ?
C6 C11 H11A 109.5 . . ?
C6 C11 H11B 109.5 . . ?
H11A C11 H11B 109.5 . . ?
C6 C11 H11C 109.5 . . ?
H11A C11 H11C 109.5 . . ?
H11B C11 H11C 109.5 . . ?
C10 C12 H12A 109.5 . . ?
C10 C12 H12B 109.5 . . ?
H12A C12 H12B 109.5 . . ?
C10 C12 H12C 109.5 . . ?
H12A C12 H12C 109.5 . . ?
H12B C12 H12C 109.5 . . ?
C10 C13 H13A 109.5 . . ?
C10 C13 H13B 109.5 . . ?
H13A C13 H13B 109.5 . . ?
C10 C13 H13C 109.5 . . ?
H13A C13 H13C 109.5 . . ?
H13B C13 H13C 109.5 . . ?
C15 C14 C19 118.1(2) . . ?
C15 C14 C2 121.4(2) . . ?
C19 C14 C2 120.3(2) . . ?
C16 C15 C14 121.2(3) . . ?
C16 C15 H15 119.4 . . ?
C14 C15 H15 119.4 . . ?
C17 C16 C15 119.8(3) . . ?
C17 C16 H16 120.1 . . ?
C15 C16 H16 120.1 . . ?
C16 C17 C18 120.2(3) . . ?
C16 C17 H17 119.9 . . ?
C18 C17 H17 119.9 . . ?
C17 C18 C19 120.3(3) . . ?
C17 C18 H18 119.9 . . ?
C19 C18 H18 119.9 . . ?
C18 C19 C14 120.4(3) . . ?
C18 C19 H19 119.8 . . ?
C14 C19 H19 119.8 . . ?
O1 Si1A C22 106.30(17) . . ?
O1 Si1A C20A 113.6(2) . . ?
C22 Si1A C20A 109.2(4) . . ?
O1 Si1A C21A 107.7(4) . . ?
C22 Si1A C21A 111.7(4) . . ?
C20A Si1A C21A 108.4(6) . . ?
O1 Si1B C20B 109.0(3) . . ?
O1 Si1B C21B 111.7(3) . . ?
C20B Si1B C21B 110.2(6) . . ?
O1 Si1B C22 102.17(15) . . ?
C20B Si1B C22 116.0(4) . . ?
C21B Si1B C22 107.6(4) . . ?
Si1B C20B H20D 109.5 . . ?
Si1B C20B H20E 109.5 . . ?
H20D C20B H20E 109.5 . . ?
Si1B C20B H20F 109.5 . . ?
H20D C20B H20F 109.5 . . ?
H20E C20B H20F 109.5 . . ?
Si1B C21B H21D 109.5 . . ?
Si1B C21B H21E 109.5 . . ?
H21D C21B H21E 109.5 . . ?
Si1B C21B H21F 109.5 . . ?
H21D C21B H21F 109.5 . . ?
H21E C21B H21F 109.5 . . ?
C25B C22 C23 117.6(4) . . ?
C25B C22 C24A 54.2(6) . . ?
C23 C22 C24A 118.4(4) . . ?
C25B C22 C24B 110.5(7) . . ?
C23 C22 C24B 94.9(4) . . ?
C24A C22 C24B 56.3(6) . . ?
C25B C22 C25A 46.3(7) . . ?
C23 C22 C25A 95.6(5) . . ?
C24A C22 C25A 100.4(9) . . ?
C24B C22 C25A 156.6(8) . . ?
C25B C22 Si1A 122.9(4) . . ?
C23 C22 Si1A 115.9(3) . . ?
C24A C22 Si1A 112.9(4) . . ?
C24B C22 Si1A 83.1(3) . . ?
C25A C22 Si1A 110.7(4) . . ?
C25B C22 Si1B 113.8(5) . . ?
C23 C22 Si1B 114.4(3) . . ?
C24A C22 Si1B 123.9(3) . . ?
C24B C22 Si1B 102.7(3) . . ?
C25A C22 Si1B 91.9(5) . . ?
Si1A C22 Si1B 19.61(8) . . ?
C22 C23 H23A 109.5 . . ?
C22 C23 H23B 109.5 . . ?
H23A C23 H23B 109.5 . . ?
C22 C23 H23C 109.5 . . ?
H23A C23 H23C 109.5 . . ?
H23B C23 H23C 109.5 . . ?
C22 C24A H24A 109.5 . . ?
C22 C24A H24B 109.5 . . ?
C22 C24A H24C 109.5 . . ?
C22 C25A H25A 109.5 . . ?
C22 C25A H25B 109.5 . . ?
C22 C25A H25C 109.5 . . ?
C22 C24B H24D 109.5 . . ?
C22 C24B H24E 109.5 . . ?
H24D C24B H24E 109.5 . . ?
C22 C24B H24F 109.5 . . ?
H24D C24B H24F 109.5 . . ?
H24E C24B H24F 109.5 . . ?
C22 C25B H25D 109.5 . . ?
C22 C25B H25E 109.5 . . ?
H25D C25B H25E 109.5 . . ?
C22 C25B H25F 109.5 . . ?
H25D C25B H25F 109.5 . . ?
H25E C25B H25F 109.5 . . ?
 
_diffrn_measured_fraction_theta_max    0.994
_diffrn_reflns_theta_full              30.00
_diffrn_measured_fraction_theta_full   0.994
_refine_diff_density_max    0.570
_refine_diff_density_min   -0.617
_refine_diff_density_rms    0.059
